# Supplementary material
Source: Springer Nature journal article supplement (https://www.springermedizin.de/resource/supplementary/12908_2009_90_MOESM1_ESM.pdf/9525118)

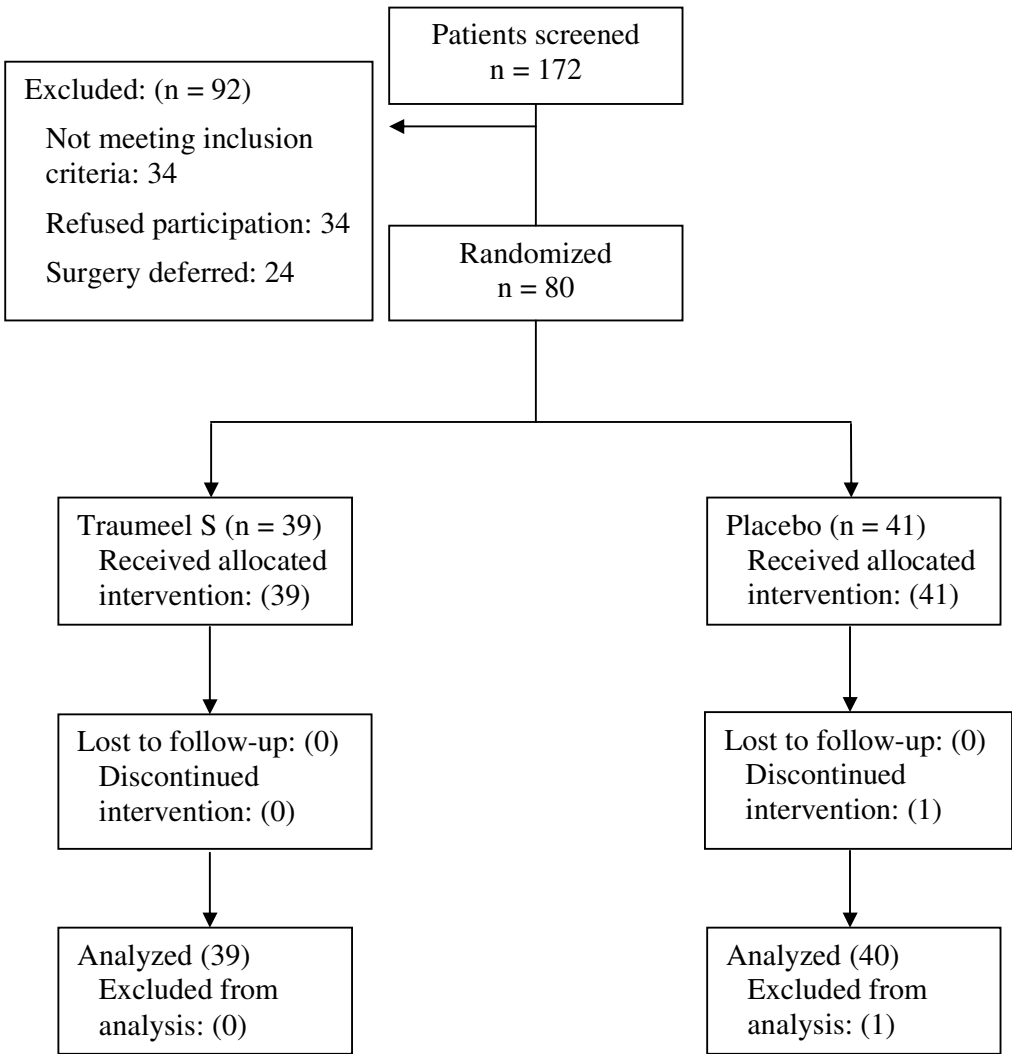

Supplement: MOESM1 [file 9525118]
